# Supplementary material for: A broad-spectrum lipidomics screen of antiinflammatory drug combinations in human blood
Source: JCI journal article supplement (doi:10.1172/jci.insight.87031), 2016-08-03
Supplement: sd1 [file 1]

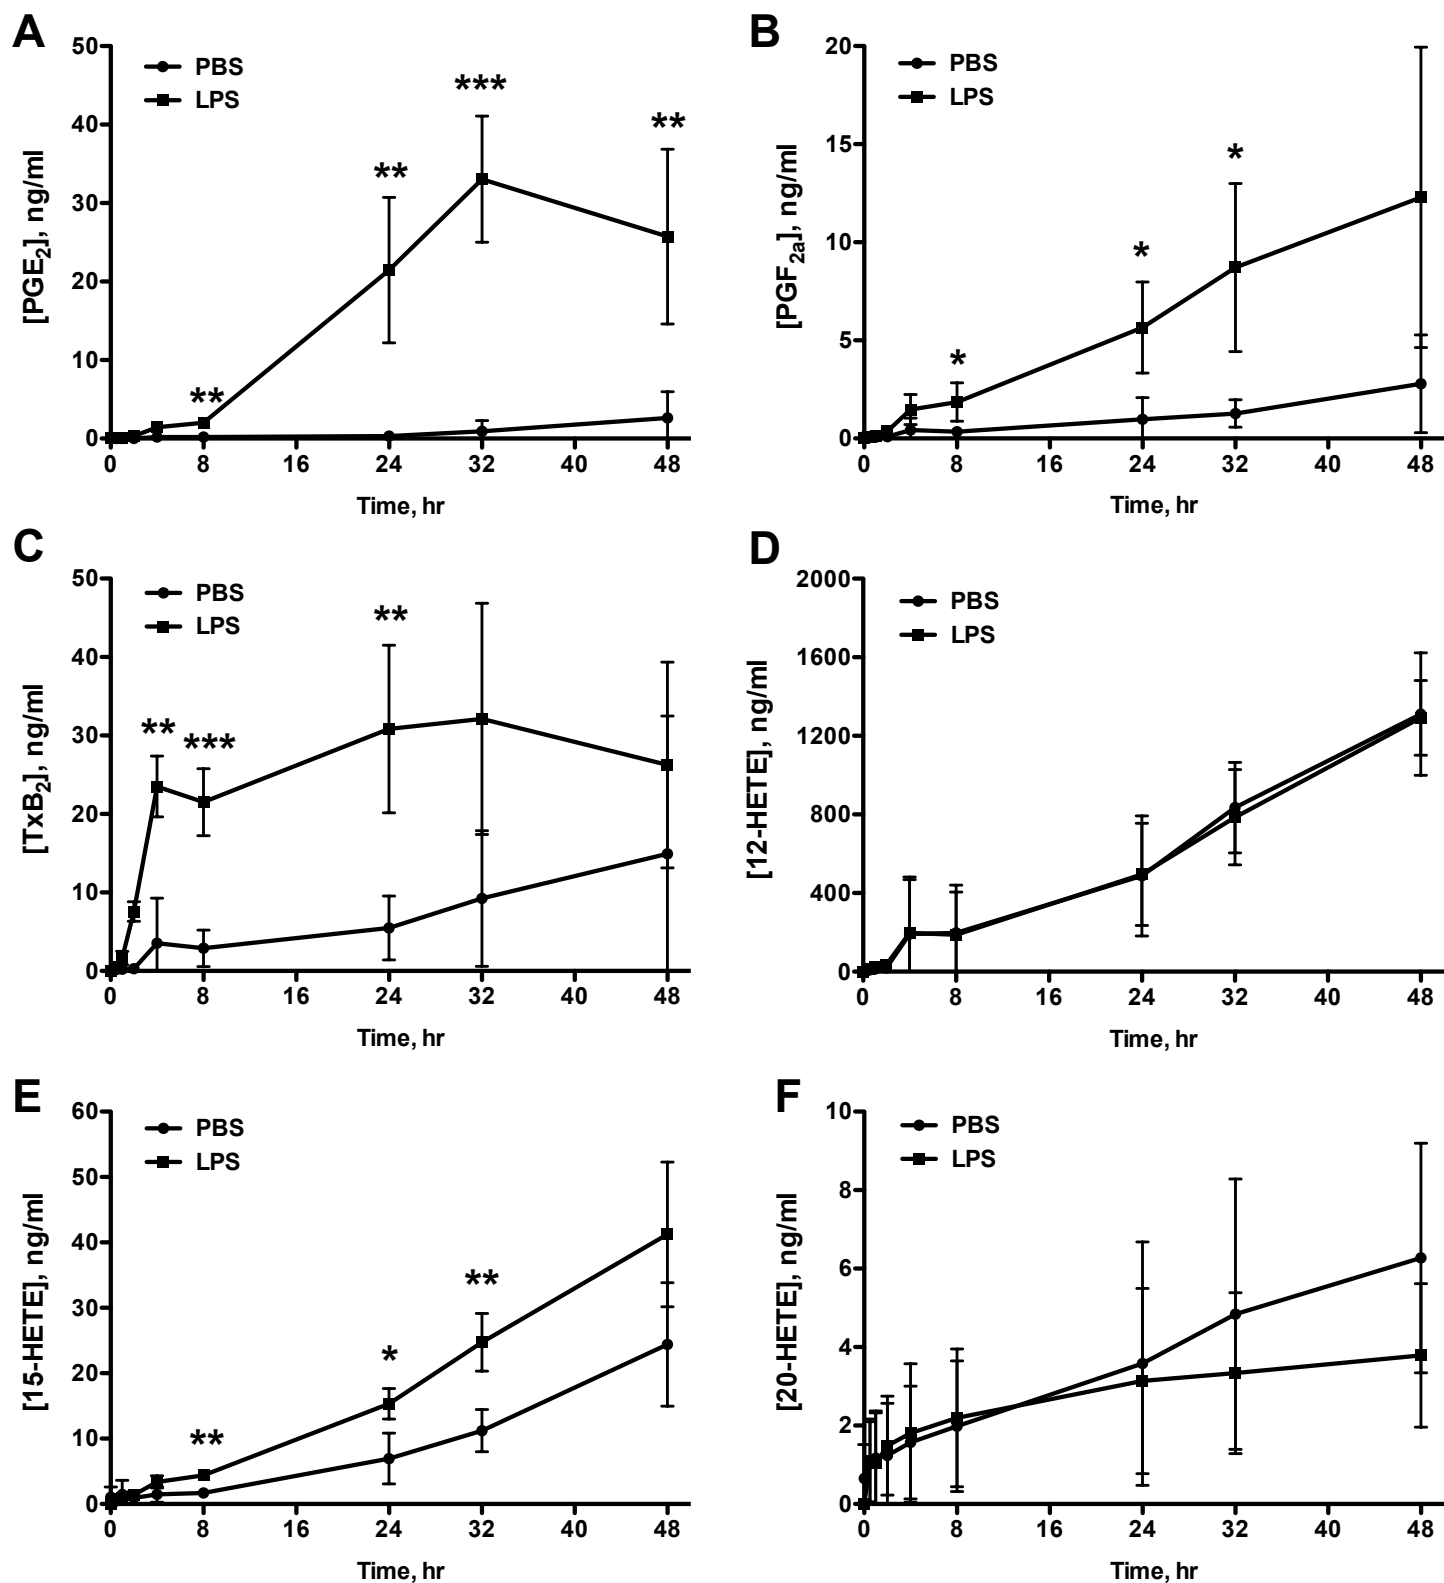

**Supplementary Figure 1. Kinetics of LPS-induced eicosanoid production in human whole blood *in vitro*.** Heparinized whole blood was incubated with 100 µg/ml of LPS for 0, 0.5, 1, 2, 4, 8, 24, 32 and 48 hr at 37 °C. PGE<sub>2</sub> (A), PGF<sub>2α</sub> (B), TxB<sub>2</sub> (C), 12-HETE (D), 15-HETE (E) and 20-HETE (F) were measured in plasma samples by UPLC-MS/MS as described in Methods. Data represent means ± S.D. from 4 donors. Unpaired t test, two-tailed \*P < 0.05, \*\*P ≤ 0.01, \*\*\*P ≤ 0.001 for values significantly greater than PBS control at the corresponding time point.

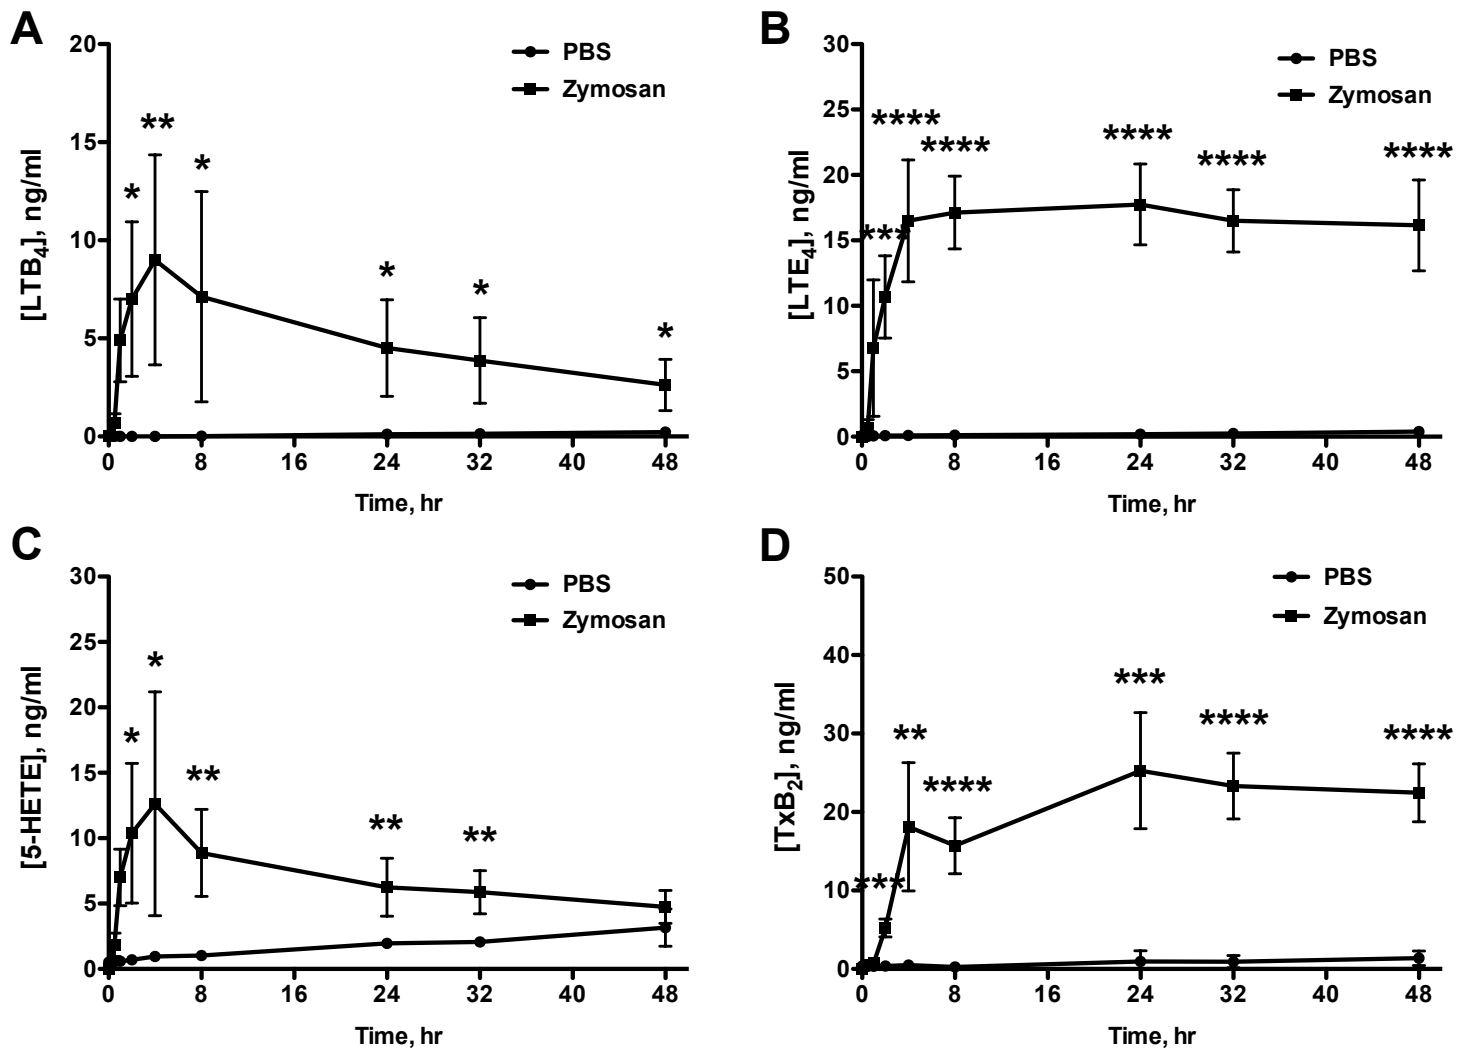

**Supplementary Figure 2. Kinetics of zymosan-induced eicosanoid production in human whole blood *in vitro*.** Heparinized whole blood was incubated with 125 µg/ml of zymosan for 0, 0.5, 1, 2, 4, 8, 24, 32 and 48 hr at 37 °C. LTB<sub>4</sub> (**A**), LTE<sub>4</sub> (**B**), 5-HETE (**C**) and TxB<sub>2</sub> (**D**) were measured in plasma samples by UPLC-MS/MS as described in Methods. Data represent means ± S.D. from 4 donors. Unpaired t test, two-tailed \*P < 0.05, \*\*P ≤ 0.01, \*\*\*P ≤ 0.001, \*\*\*\*P ≤ 0.0001 for values significantly greater than PBS control at the corresponding time point.

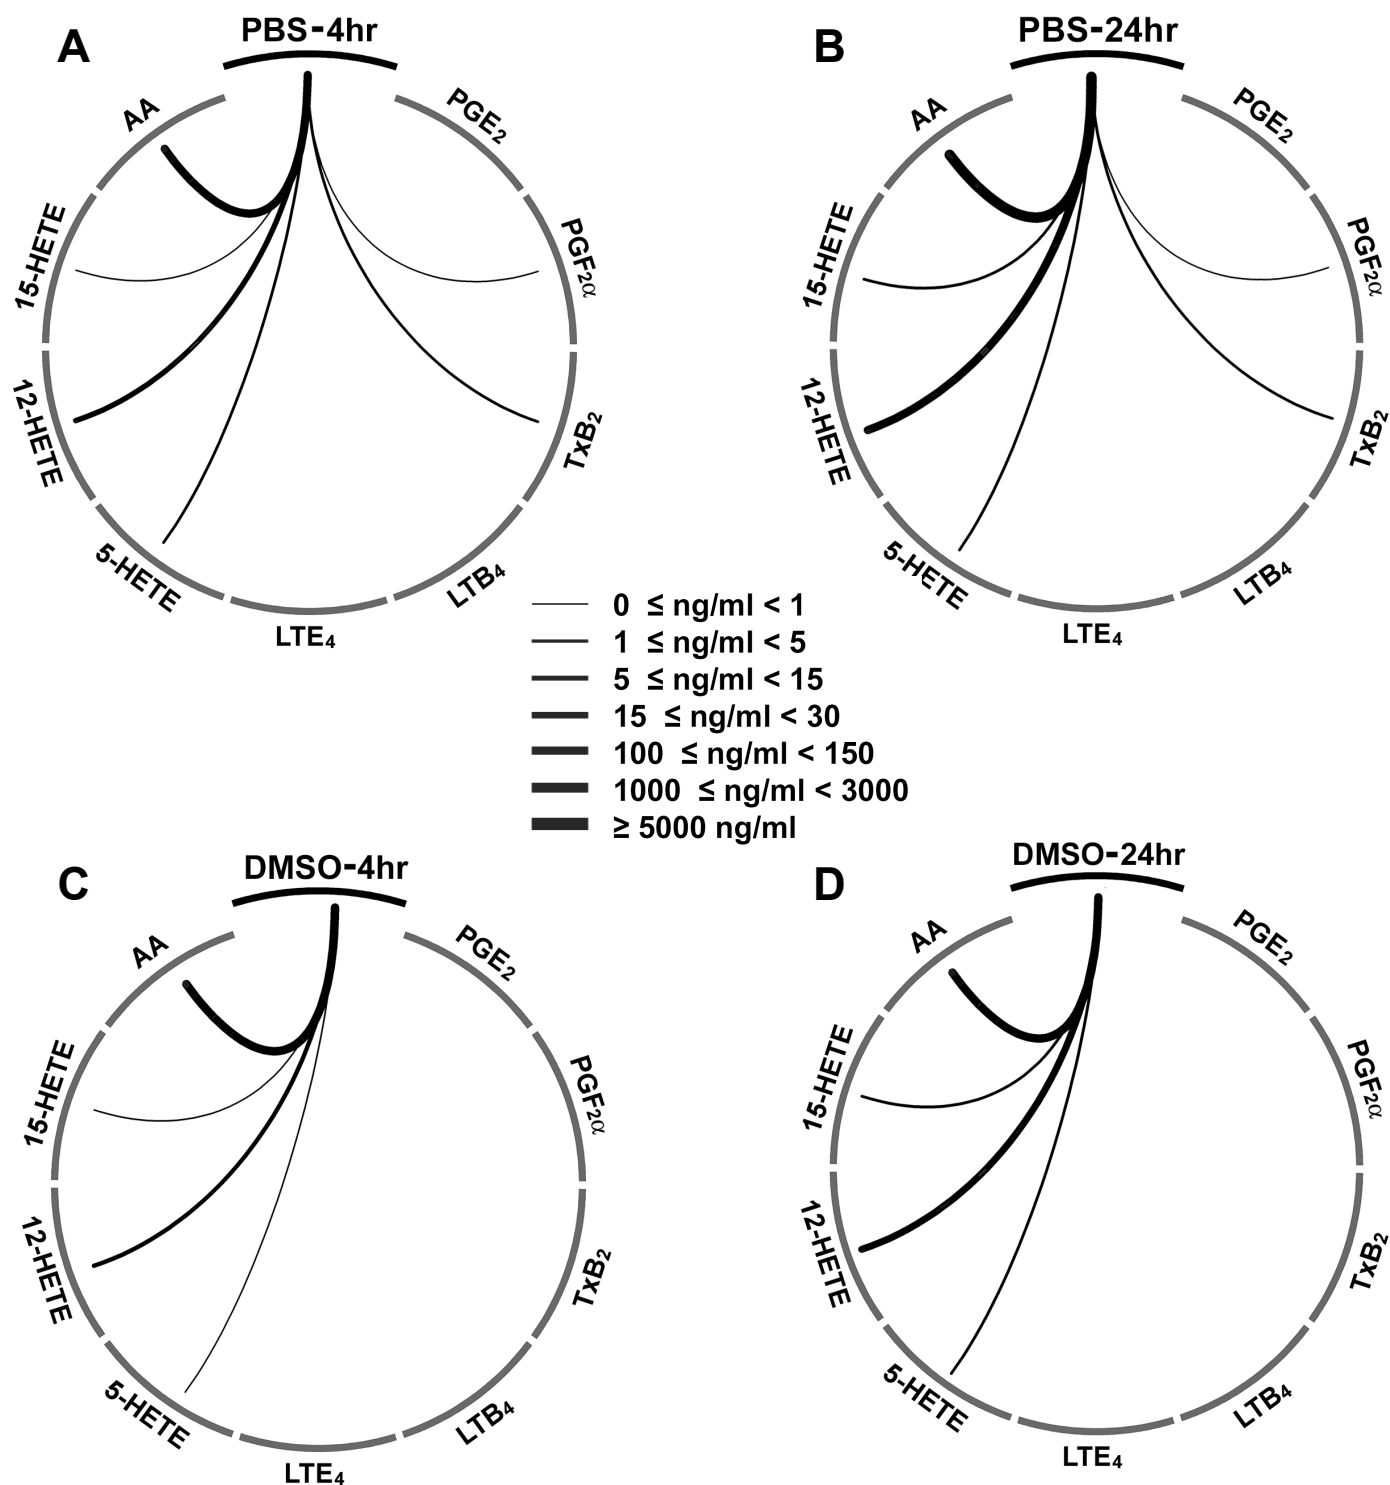

**Supplementary Figure 3. Human plasma eicosanoid production in PBS or DMSO vehicle controls in whole blood *in vitro*.** Circos plots comparing plasma eicosanoids of human whole blood incubated with PBS or DMSO vehicles for 4 or 24 hours (n=22). *In vitro* human whole-blood assay and UPLC-MS/MS analysis were performed as described in Methods.

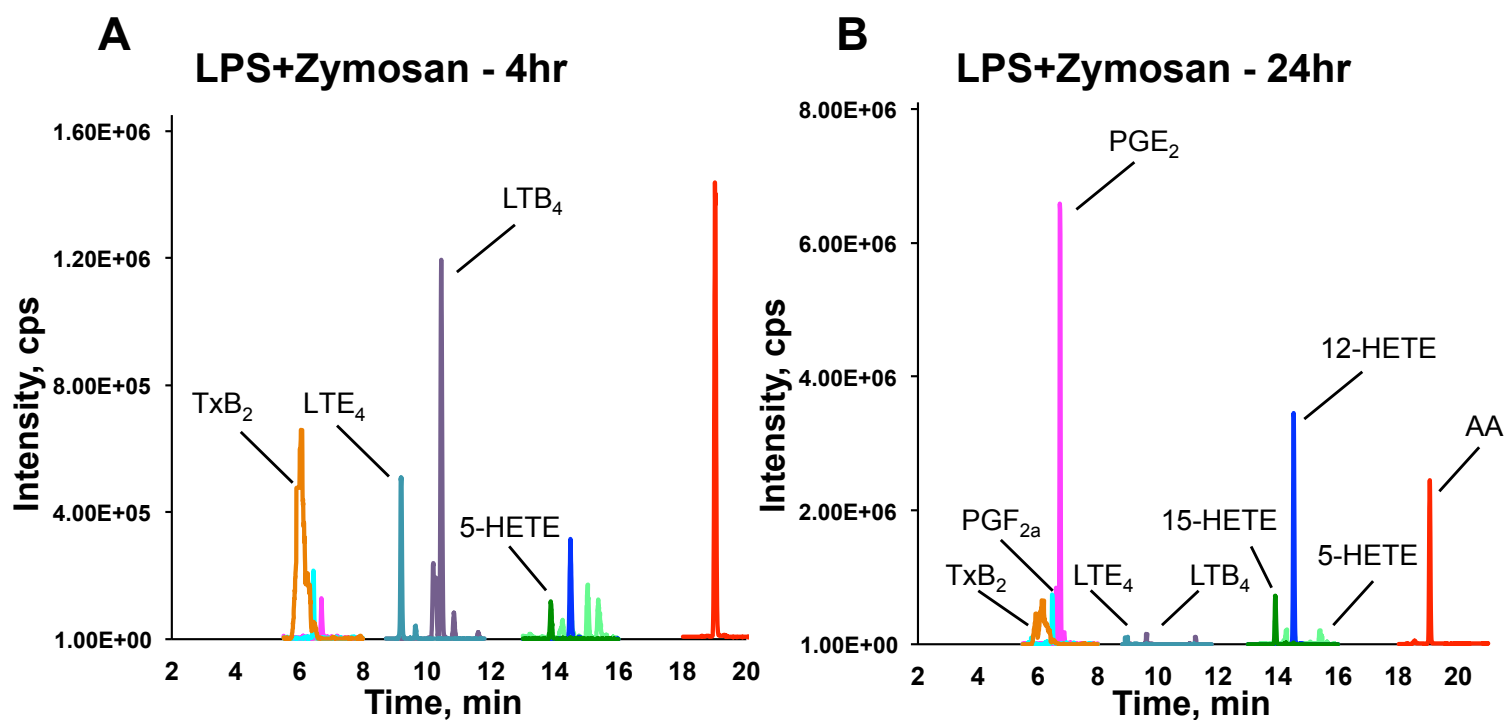

**Supplementary Figure 4. UPLC-MS/MS profiling of bioactive eicosanoids in *in vitro* stimulated human whole blood.** Representative chromatograms of eicosanoids in whole blood co-stimulated with 100  $\mu\text{g}/\text{ml}$  of LPS and 125  $\mu\text{g}/\text{ml}$  of zymosan for 4 hr (**A**) or 24 hr (**B**). Selected peaks were identified by comparison with isotope-labeled standards.

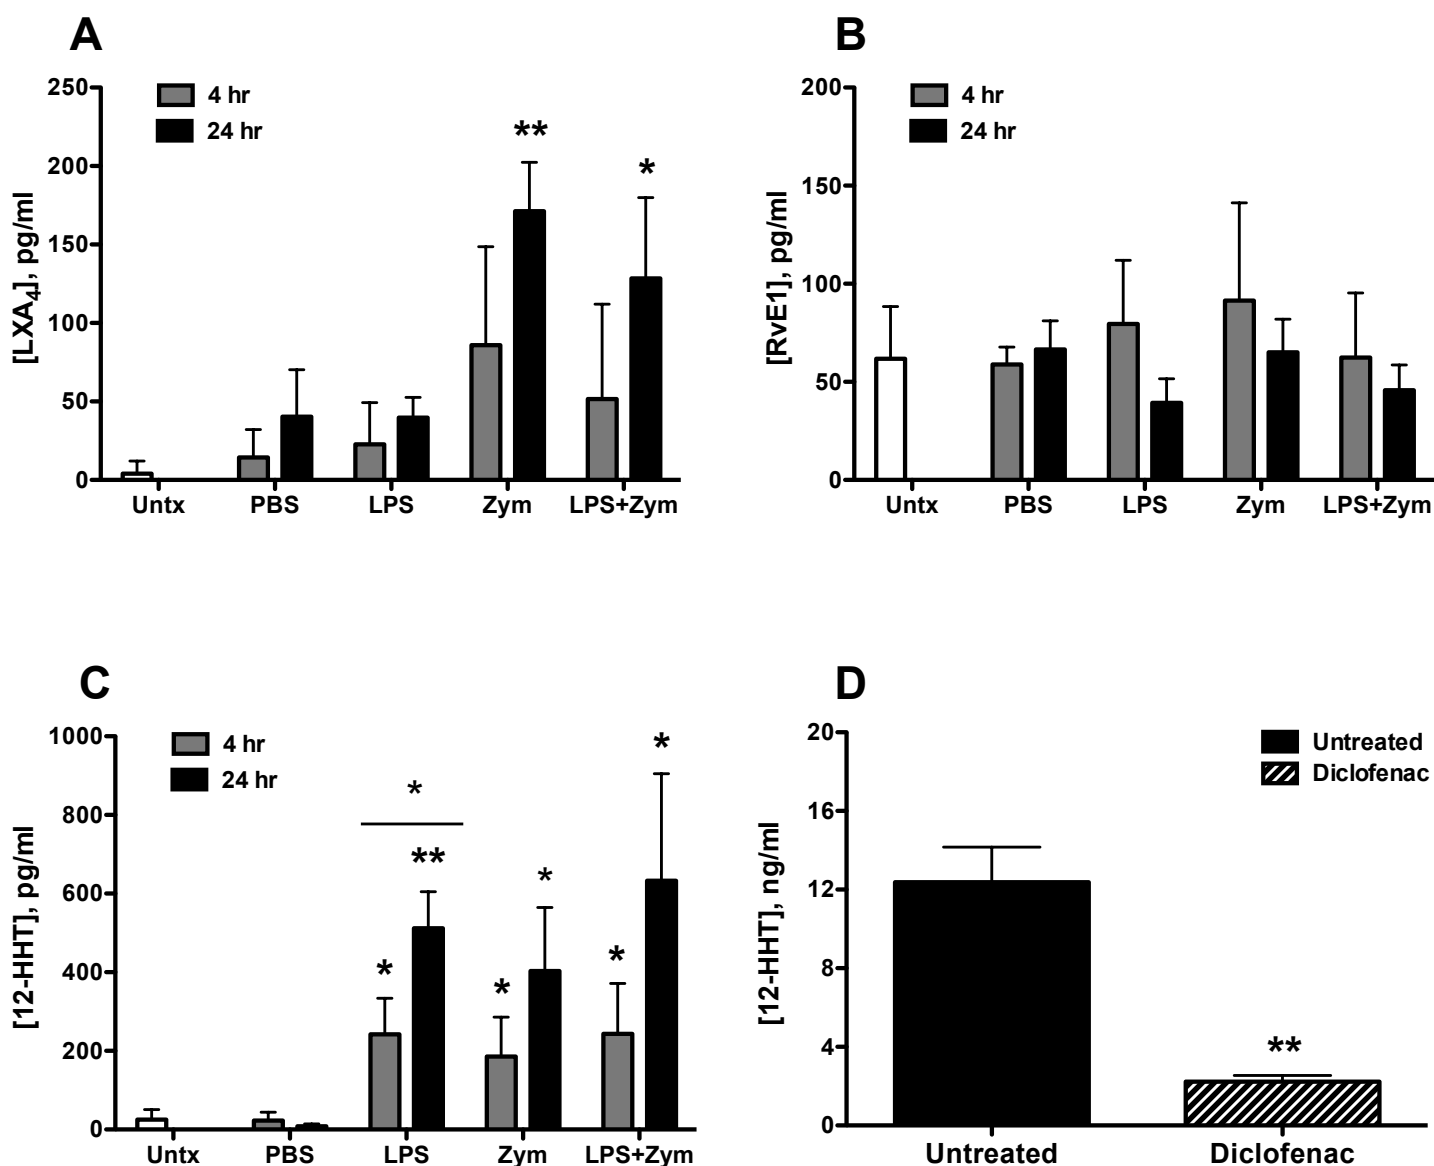

**Supplementary Figure 5. Production of lipoxin A<sub>4</sub> (LXA<sub>4</sub>), resolvin E1 (RvE1) and 12-HHT by human whole blood *in vitro*.** Heparinized whole blood was incubated with 100 µg/ml of LPS and/or with 125 µg/ml of zymosan for 4 and 24 hr at 37 °C. LXA<sub>4</sub> (A), RvE1 (B) and 12-HHT (C) were measured in plasma samples by UPLC-MS/MS. Human whole blood was incubated for 1 hr at 37 °C to allow coagulation. 12-HHT (D) was measured in sera from untreated and diclofenac-inhibited (10 µM) whole blood by UPLC-MS/MS. Data represent means ± S.D. from 4 donors. Paired t test, two-tailed \**P* < 0.05, \*\**P* ≤ 0.01 for values significantly greater than PBS control at the corresponding time point for plasma and greater than untreated control for serum.

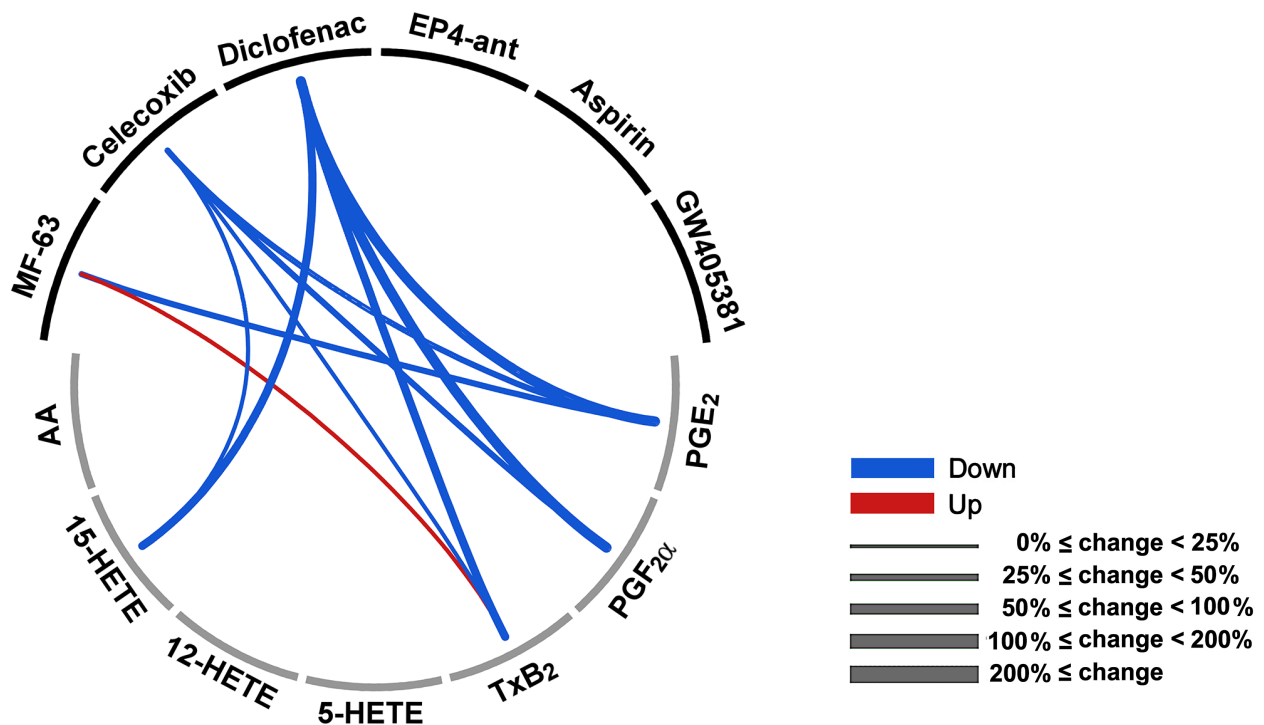

**Supplementary Figure 6. Effect of drugs targeting the COX pathway and used at the corresponding  $IC_{50}$  on human plasma lipidome *in vitro*.** Circos plot comparing plasma eicosanoid profiles of human whole blood stimulated with 100 µg/ml LPS and treated with the mPGES-1 inhibitor, MF-63 (n=5), COX-2 inhibitor celecoxib (n=5), COX-1/2 inhibitor diclofenac (n=5), COX-2 inhibitor GW406381 (n=5), COX-1/-2 inhibitor aspirin (n=4) or EP4 antagonist CJ-042794 (n=5). All compounds, except aspirin (15 µM), were used at the corresponding  $IC_{50}$ . *In vitro* human whole-blood assay and UPLC-MS/MS analysis were performed as described in Methods. Data expressed as percent of LPS +DMSO control. Red lines indicate significantly elevated levels of the corresponding lipid, while blue lines indicate significant reductions; thickness of lines represents degree of change. One-sample, two-tailed *t* test.

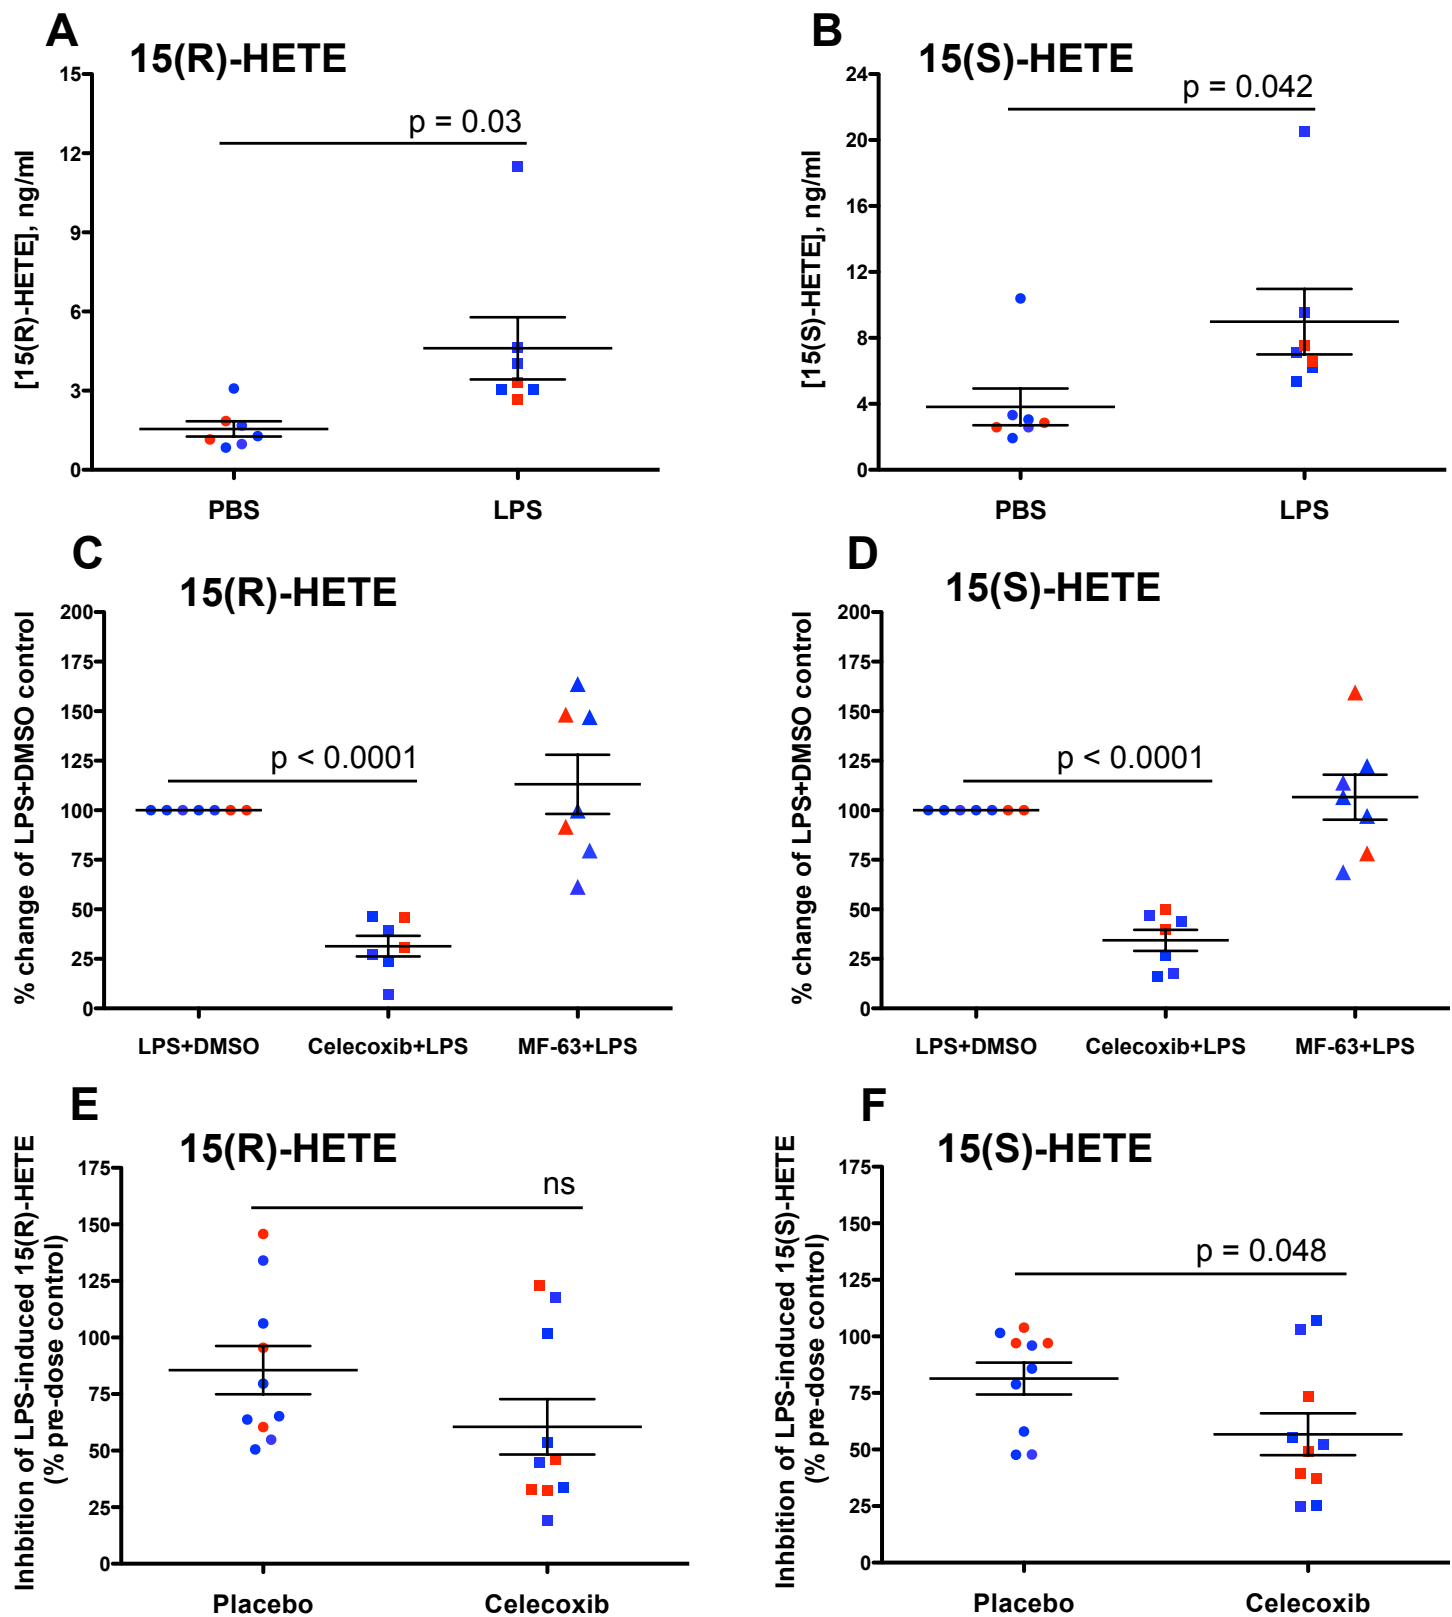

**Supplementary Figure 7. Effects of COX-2 vs mPGES-1 inhibition on chiral products of 15-HETE in human plasma.** For *in vitro* assay, whole blood was stimulated with 100  $\mu\text{g/ml}$  LPS and treated with the mPGES-1 inhibitor, MF-63, or with a COX-2 inhibitor, celecoxib, at 10  $\mu\text{M}$  each, for 24 hr. *In vitro* human whole-blood assay and chiral LC-ECAPCI/MS analysis were performed as described in Methods. LPS-triggered 15(R)-HETE (**A**) and 15(S)-HETE (**B**) represent means  $\pm$  S.D. expressed in ng/ml. Unpaired, two-tailed *t* test,  $n=7$ . Drug effects on plasma levels of 15(R)-HETE (**C**) and 15(S)-HETE (**D**) expressed as percent of LPS+DMSO control. One-sample, two-tailed *t* test,  $n=7$ . For *ex vivo* assay, whole blood was collected before (pre-dose) and 3 hr after (post-dose) celecoxib or placebo administration. Plasma levels of 15(R)-HETE (**E**) and 15(S)-HETE (**F**) expressed as percent of pre-dose control. *Ex vivo* human whole blood assay and chiral LC-ECAPCI/MS analysis were performed as described in Methods. Red and blue dots represent female and male subjects, respectively. Unpaired, two-tailed *t* test,  $n=10/\text{group}$ ; ns: non significant.

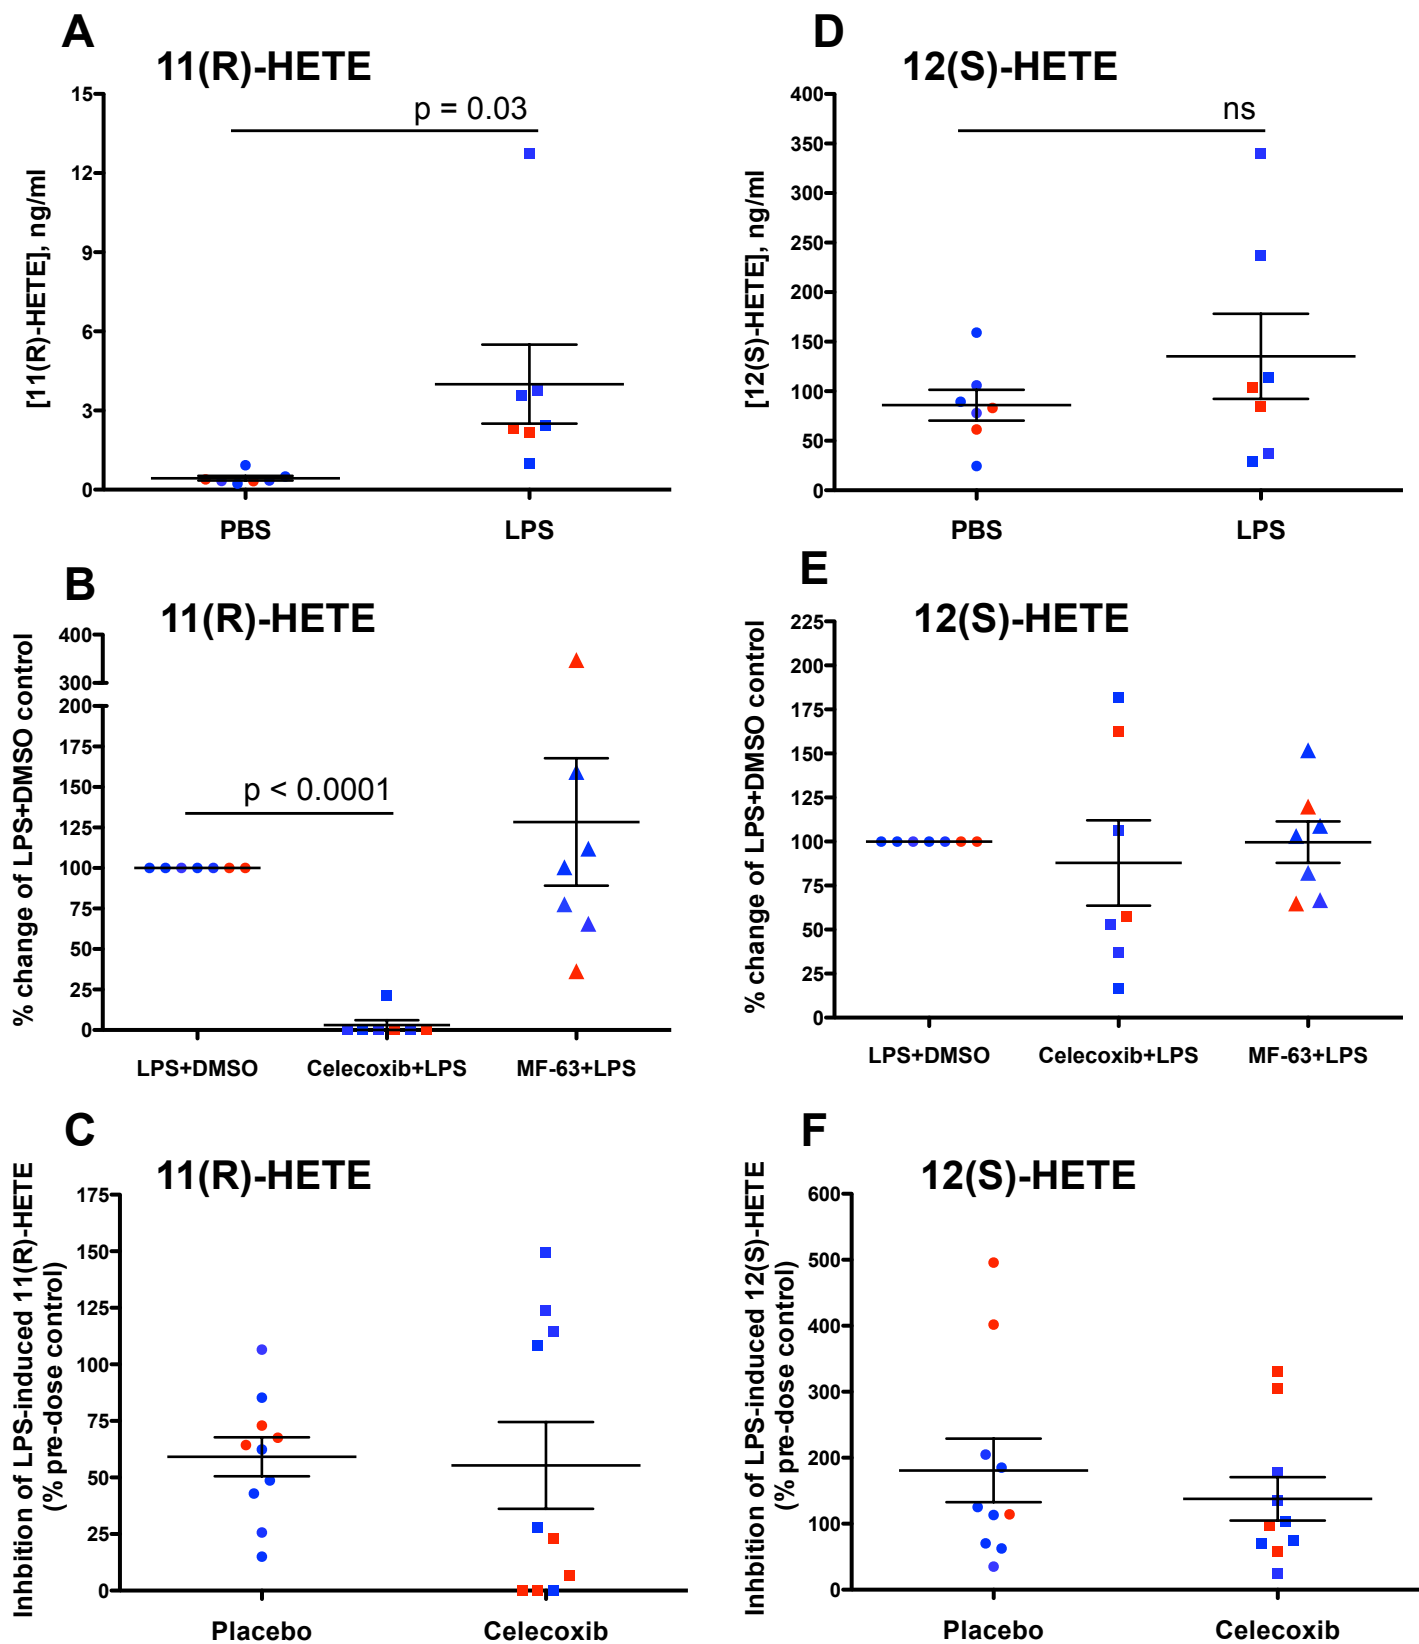

**Supplementary Figure 8. Effects of COX-2 vs mPGES-1 inhibition on chiral products of 11(R)-HETE and 12(S)-HETE in human plasma.** For *in vitro* assay, whole blood was stimulated with 100  $\mu$ g/ml LPS and treated with the mPGES-1 inhibitor, MF-63, or with a COX-2 inhibitor, celecoxib, at 10  $\mu$ M each, for 24 hr. *In vitro* human whole-blood assay and chiral LC-ECAPCI/MS analysis was performed as described in Methods. LPS-triggered 11(R)-HETE (**A**) and 12(S)-HETE (**D**) represent means  $\pm$  SEM expressed in ng/ml. Unpaired, two-tailed *t* test, *n*=7. Drug effects on plasma levels of 11(R)-HETE (**B**) and 12(S)-HETE (**E**) expressed as percent of LPS+DMSO control. One-sample, two-tailed *t* test, *n*=7. For *ex vivo* assay, whole blood was collected before (pre-dose) and 3 hr after (post-dose) celecoxib or placebo administration. Plasma levels of 11(R)-HETE (**C**) and 12(S)-HETE (**F**) expressed as percent of pre-dose control. *Ex vivo* human whole blood assay and chiral LC-ECAPCI/MS analysis was performed as described in Methods. Red and blue dots represent female and male subjects, respectively. Unpaired, two-tailed *t* test, *n*=10/group. ns: non significant.



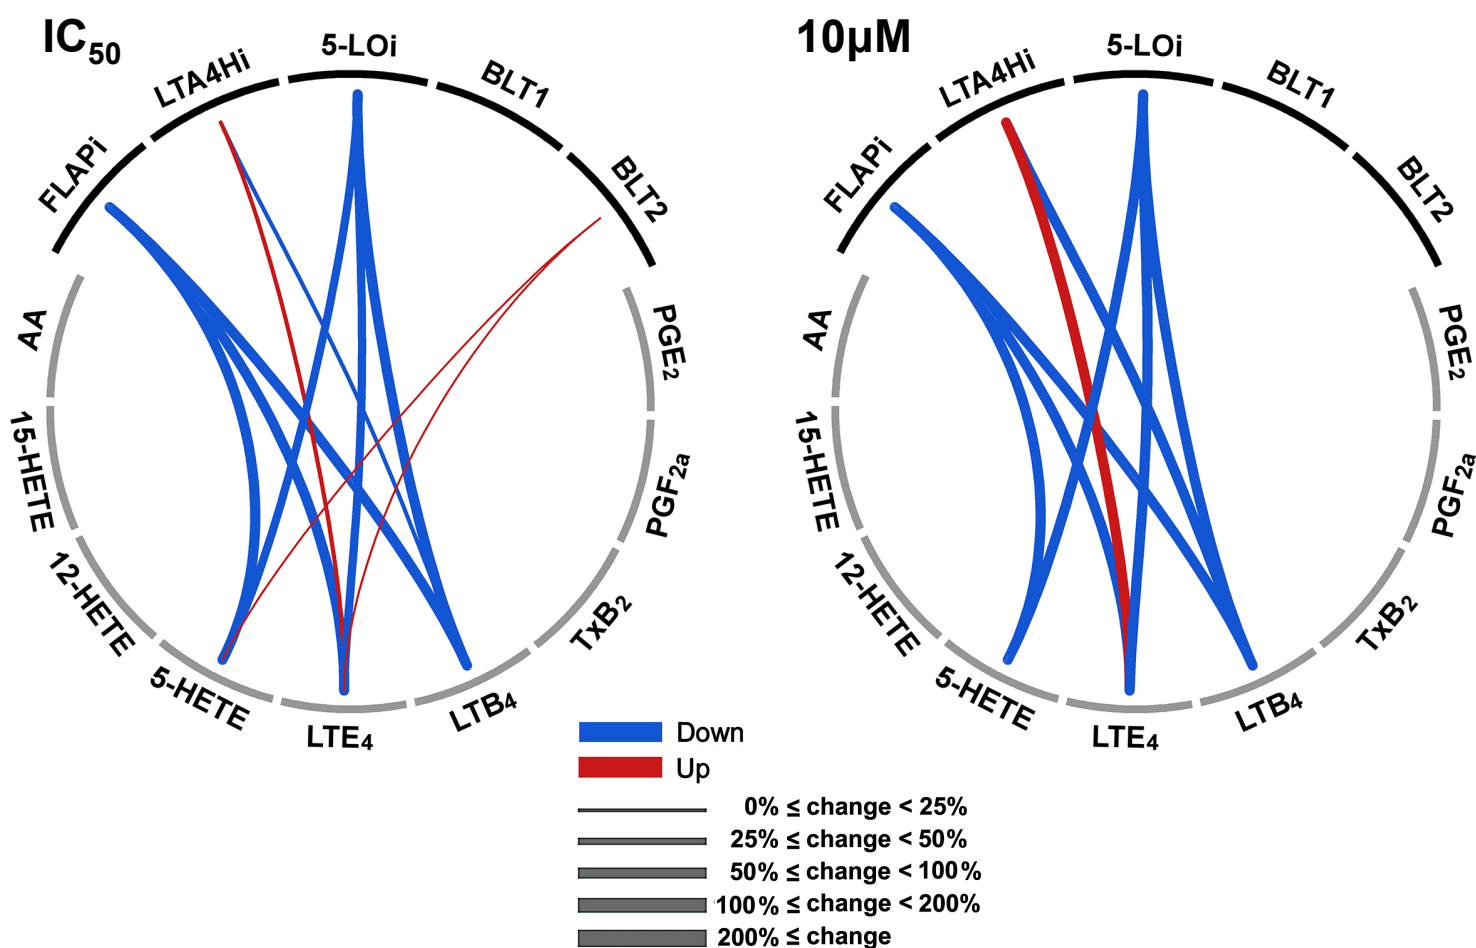

**Supplementary Figure 9. Differential effects of drugs targeting the 5-LOX pathway on human plasma lipidome *in vitro*.** Circos plots comparing plasma eicosanoid profiles of human whole blood stimulated with 125 μg/ml zymosan and treated with the FLAP inhibitor MK-0591 (n=5), LTA<sub>4</sub>H inhibitor SC-57461A (n=5), 5-LOX inhibitor ABT-761 (n=5), BLT1-type LTB<sub>4</sub> antagonist LY293111 (n=5) or BLT2-type LTB<sub>4</sub> antagonist LY255283 (n=5). All compounds were used at the corresponding IC<sub>50</sub> or 10 μM concentration. *In vitro* human whole-blood assay and UPLC-MS/MS analysis were performed as described in Methods. Data expressed as percent of zymosan+DMSO control. Red lines indicate significantly elevated levels of the corresponding lipid, while blue lines indicate significant reductions; thickness of lines represents degree of change. One-sample, two-tailed *t* test.

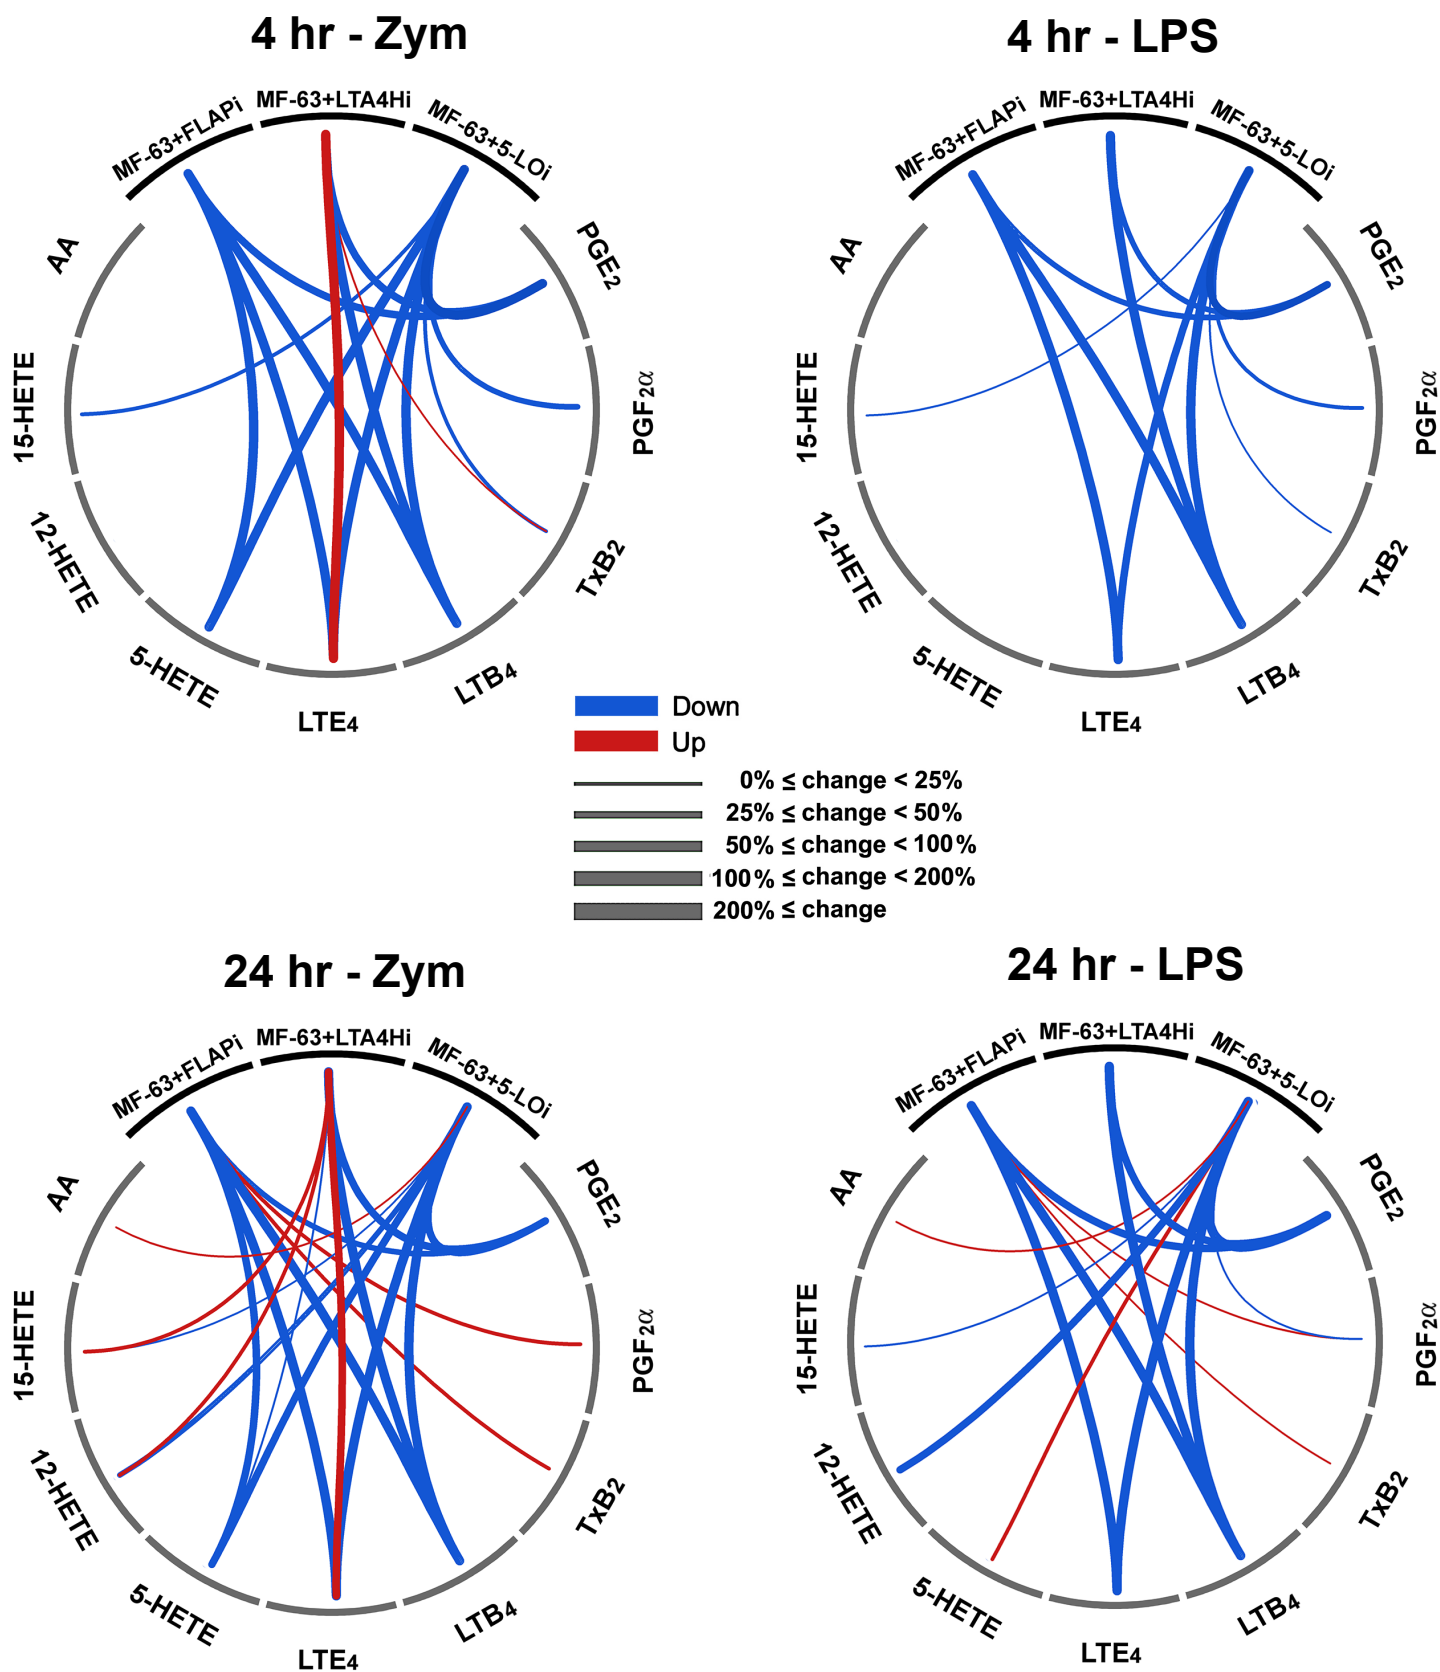

**Supplementary Figure 10. Stimulus- and time-dependent effects of drug combinations on human plasma lipidome *in vitro*.** Human whole blood was stimulated with 100 µg/ml of LPS or 125 µg/ml of zymosan and treated with the mPGES-1i MF-63, in combination with the FLAPi MK-0591, or with the LTA<sub>4</sub>Hi SC-57461A, or with the 5-LOXi ABT-761, for 4 or 24 hr. All compounds were used at 10 µM. *In vitro* human whole-blood assay and UPLC-MS/MS analysis were performed as described in Methods. Data expressed as percent of LPS+DMSO or zymosan+DMSO controls. Red lines indicate significantly elevated levels of the corresponding lipid, while blue lines indicate significant reductions; thickness of lines represents degree of change. One-sample, two-tailed *t* test, n=5.

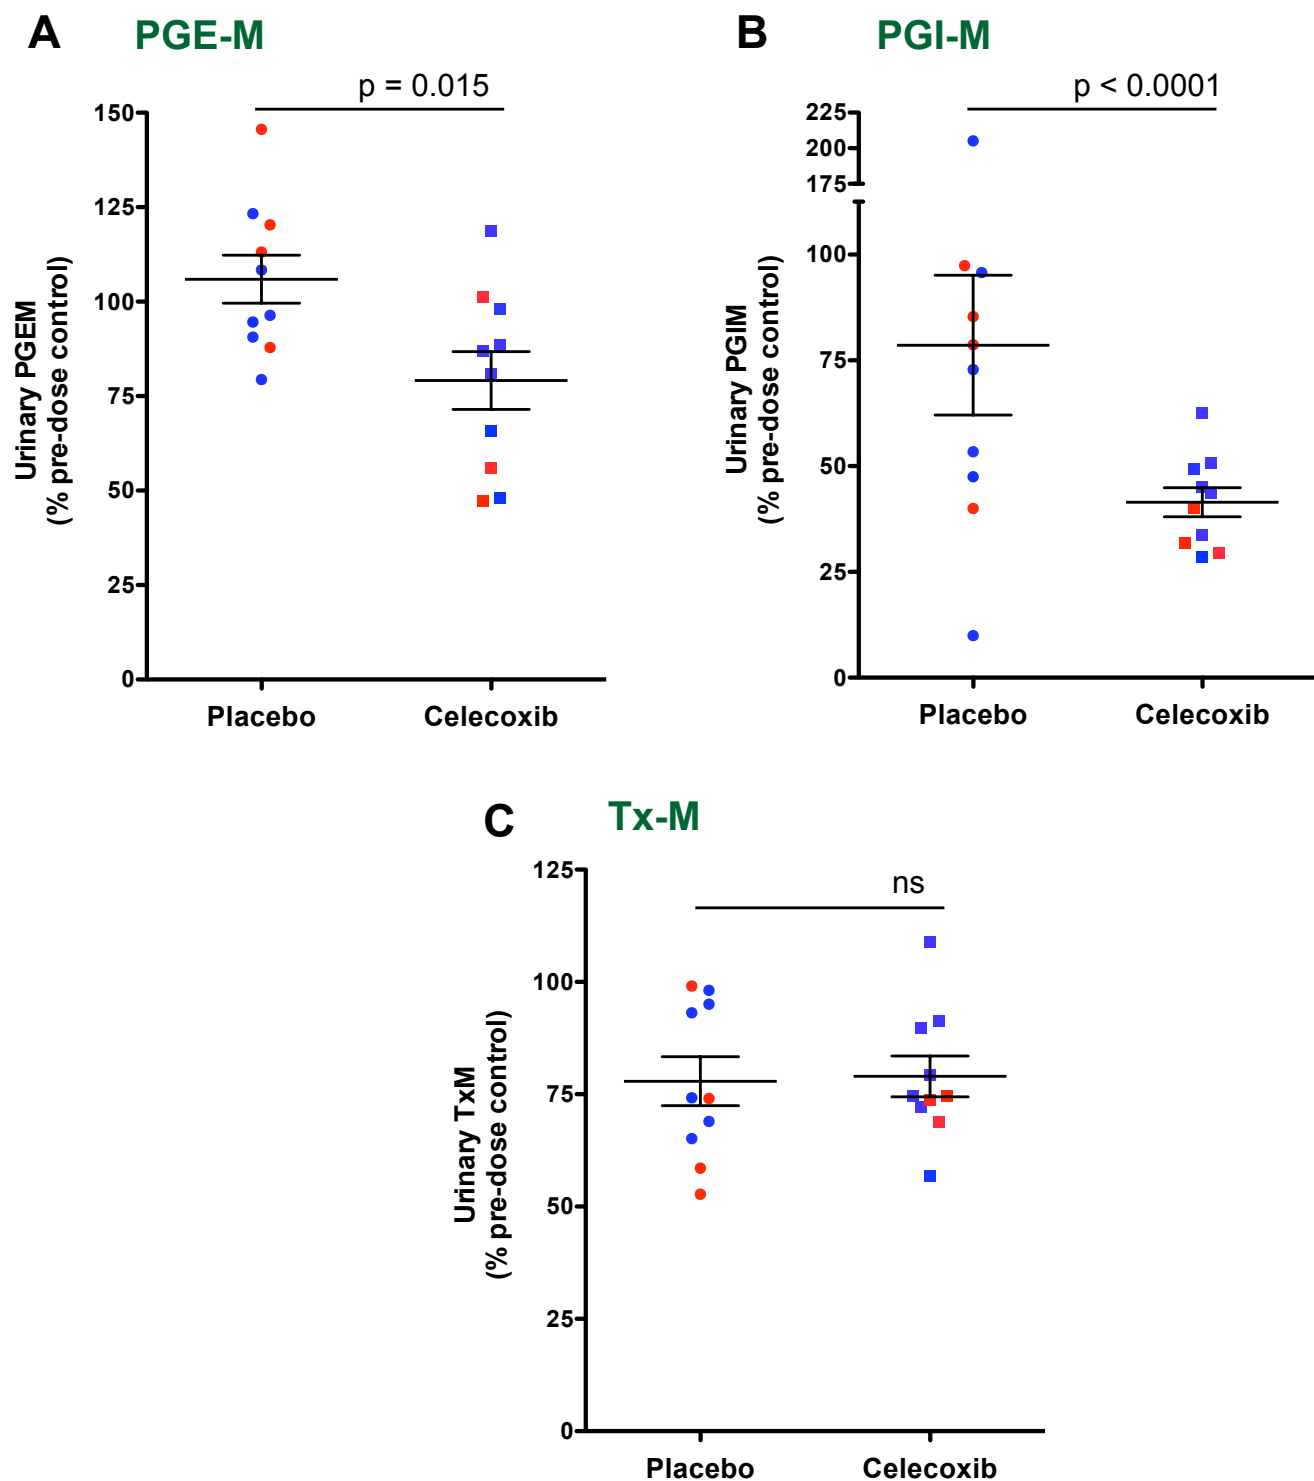

**Supplementary Figure 11. Effect of celecoxib on urinary eicosanoid metabolites at  $T_{\max}$ .** Urine samples were collected before (pre-dose) and 3 hr after (post-dose) celecoxib or placebo administration. Urinary metabolites of  $\text{PGE}_2$ , PGE-M (**A**), of  $\text{PGI}_2$ , PGI-M (**B**), and  $\text{TxB}_2$ , Tx-M (**C**) were analyzed by UPLC-MS/MS and expressed as percent of pre-dose control. Red color – female subjects, blue color – male subjects. Unpaired, two-tailed  $t$  test,  $n=10/\text{group}$ . PGE-M – tetranor-PGEM, PGI-M – 2,3-dinor-6-keto-PGF $_{1\alpha}$ , Tx-M – 11-dehydro-TxB $_2$ , ns: non significant.

**A 11(R)-HETE**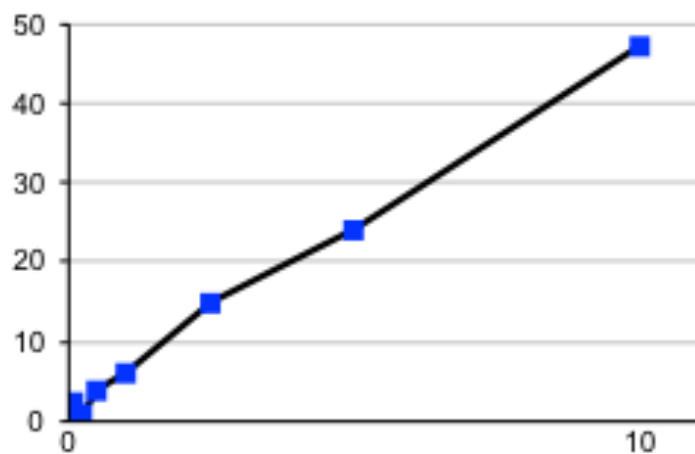**B 11(S)-HETE**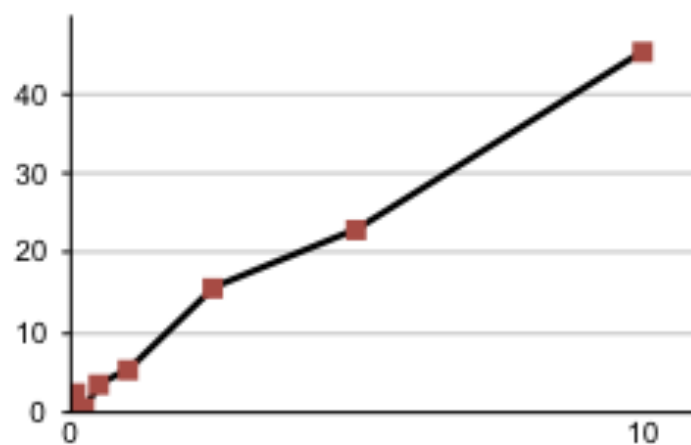**C 12(R)-HETE**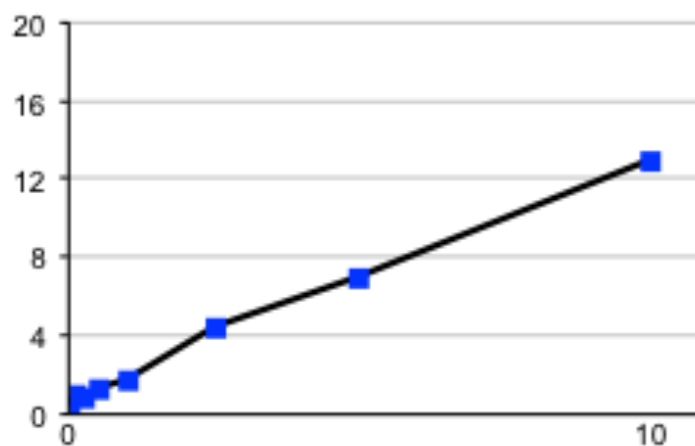**D 12(S)-HETE**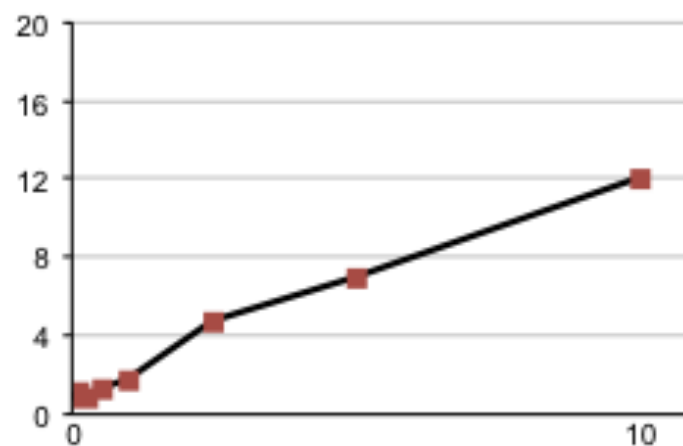**E 15(R)-HETE**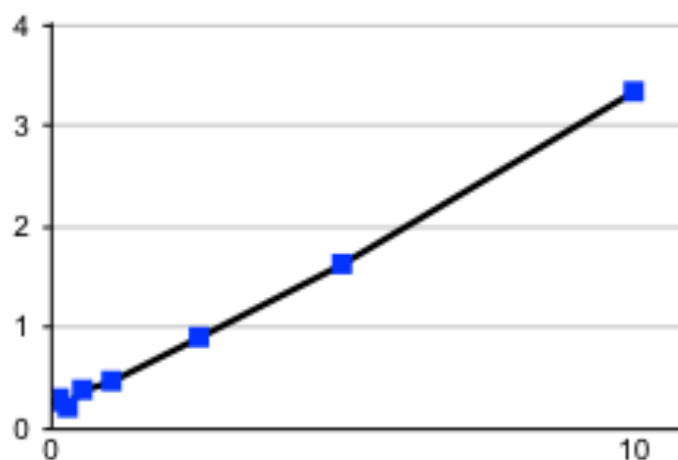**F 15(S)-HETE**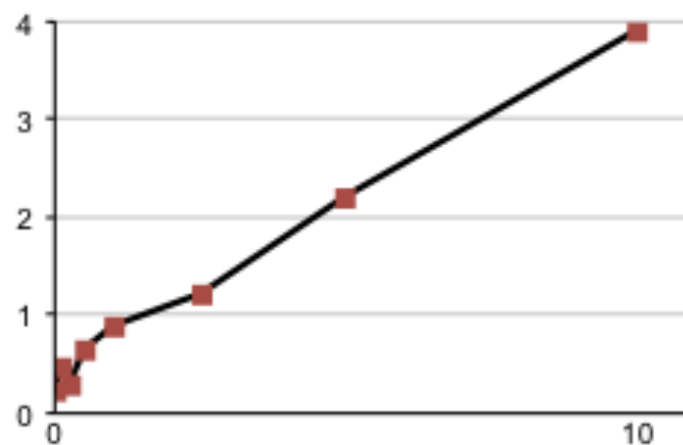

**Supplementary Figure 12. Calibration curves for chiral 11-hydroxyeicosatetraenoic acid (11-HETE), 12-hydroxyeicosatetraenoic acid (12-HETE) and 15-hydroxyeicosatetraenoic acid (15-HETE).** Calibration samples were spiked with authentic standards of 11(S)-HETE, 11(R)-HETE, (±)12-HETE and (±)15-HETE in the amounts of 0, 0.1, 0.25, 0.5, 1, 2.5, 5 ng, and 1 ng of the internal standard [d8]-15-(S)-HETE. Calibration curves for 11(R)-HETE (**A**), 11(S)-HETE (**B**), 12(R)-HETE (**C**), 12(S)-HETE (**D**), 15(R)-HETE (**E**) and 15(S)-HETE (**F**) were plotted using a linear regression of peak area ratio of analytes against the internal standard.

| Drug/<br>compound      | Target                              | IC <sub>50</sub> , $\mu$ M | Assay                                                                                         | Method of<br>detection     | Reference |
|------------------------|-------------------------------------|----------------------------|-----------------------------------------------------------------------------------------------|----------------------------|-----------|
| ABT-761                | 5-LOX                               | 0.15                       | hWBA, A23187-trigg LTB <sub>4</sub>                                                           | EIA for LTB <sub>4</sub>   | <b>53</b> |
| MK-0591                | FLAP                                | 0.51                       | hWBA, A23187-trigg LTB <sub>4</sub>                                                           | RIA for LTB <sub>4</sub>   | <b>54</b> |
| SC-57461A              | LTA <sub>4</sub> H                  | 0.05                       | hWBA, A23187-trigg LTB <sub>4</sub>                                                           | ELISA for LTB <sub>4</sub> | <b>55</b> |
| LY-293111              | BLT1-type LTB <sub>4</sub> receptor | 1.1                        | Plasma-depleted human blood, LTB <sub>4</sub> triggered by fMLP and thrombin                  | EIA for LTB <sub>4</sub>   | <b>56</b> |
| LY-255283 <sup>A</sup> | BLT2-type LTB <sub>4</sub> receptor | ~1                         | Competitive inhibition of LTB <sub>4</sub> for binding to human recombinant BLT2              | Binding assay              | <b>58</b> |
| MF-63                  | mPGES-1                             | 0.8                        | hWBA, LPS-triggered PGE <sub>2</sub>                                                          | EIA for PGE <sub>2</sub>   | <b>51</b> |
| Aspirin                | COX-1/-2                            | 15 <sup>B</sup>            | NA                                                                                            | NA                         | <b>49</b> |
| Celecoxib              | COX-2                               | 0.3                        | hWBA, LPS-triggered PGE <sub>2</sub>                                                          | EIA for PGE <sub>2</sub>   | <b>48</b> |
| Diclofenac             | COX-1/-2                            | 0.01                       | hWBA, LPS-triggered PGE <sub>2</sub>                                                          | RIA for PGE <sub>2</sub>   | <b>49</b> |
| GW406381               | COX-2                               | 0.042                      | hWBA, LPS-triggered PGE <sub>2</sub>                                                          | EIA for PGE <sub>2</sub>   | <b>50</b> |
| CJ-042794              | EP <sub>4</sub> receptor            | 0.4                        | hWBA, inhibition of LPS-triggered TNF $\alpha$ in competition with exogenous PGE <sub>2</sub> | ELISA for TNF $\alpha$     | <b>52</b> |

<sup>A</sup> – LY-255283 was tested in human whole blood for LTB<sub>4</sub> inhibition (57) but no IC<sub>50</sub> was provided.

<sup>B</sup> – 15  $\mu$ M corresponds to peak systemic plasma concentration of low-dose aspirin (59).

**Supplementary Table 1. Concentrations of the tested drugs that inhibited 50% of response (IC<sub>50</sub>) in a human whole-blood assay or the corresponding assay.**

| Compounds                         | Parent ion<br>(m/z) | Product ion<br>(m/z) | Collision energy<br>(eV) | Retention time<br>(min) |
|-----------------------------------|---------------------|----------------------|--------------------------|-------------------------|
| PGE <sub>2</sub>                  | 351.2               | 315.2                | 10                       | 6.69                    |
| PGF <sub>2α</sub>                 | 353.2               | 193.1                | 24                       | 6.44                    |
| TxB <sub>2</sub>                  | 369.2               | 169.1                | 17                       | 6.07                    |
| LTB <sub>4</sub>                  | 335.2               | 195.1                | 16                       | 10.44                   |
| LTE <sub>4</sub>                  | 438.2               | 333.2                | 16                       | 9.66                    |
| 5-HETE                            | 319.2               | 115.0                | 15                       | 15.03                   |
| 12-HETE                           | 319.2               | 179.1                | 7                        | 14.49                   |
| 15-HETE                           | 319.2               | 219.2                | 13                       | 13.87                   |
| AA                                | 303.2               | 259.2                | 12                       | 19.01                   |
| *12-HHT                           | 279.2               | 179.15               | 12                       | 11.46                   |
| RvD1                              | 375.2               | 141.1                | 13                       | 7.76                    |
| RvD2                              | 375.2               | 141.1                | 13                       | 7.09                    |
| LXA <sub>4</sub>                  | 351.2               | 115.1                | 13                       | 7.83                    |
| *RvE1                             | 349.2               | 161.1                | 15                       | 4.61                    |
| *MaR1                             | 359.2               | 177.1                | 14                       | 10.15                   |
| *PD                               | 359.2               | 153.1                | 15                       | 10.02                   |
| 8(R)-HETE-PFB                     | 319.23              | 155.06               | 16                       | 9.18                    |
| 8(S)-HETE-PFB                     | 319.23              | 155.06               | 16                       | 9.76                    |
| 11(R)-HETE-PFB                    | 319.23              | 167.1                | 16                       | 8.9                     |
| 11(S)-HETE-PFB                    | 319.23              | 167.1                | 16                       | 9.73                    |
| 12(R)-HETE-PFB                    | 319.23              | 179.1                | 14                       | 9.37                    |
| 12(S)-HETE-PFB                    | 319.23              | 179.1                | 14                       | 9.64                    |
| 15(R)-HETE-PFB                    | 319.23              | 219.1                | 13                       | 9.57                    |
| 15(S)-HETE-PFB                    | 319.23              | 219.1                | 13                       | 11.1                    |
|                                   |                     |                      |                          |                         |
| PGE <sub>2</sub> -d <sub>4</sub>  | 355.2               | 319.2                | 10                       | 6.66                    |
| PGF <sub>2α</sub> -d <sub>4</sub> | 357.2               | 197.1                | 24                       | 6.43                    |
| TxB <sub>2</sub> -d <sub>4</sub>  | 373.2               | 173.1                | 17                       | 6.09                    |
| LTB <sub>4</sub> -d <sub>4</sub>  | 339.2               | 197.1                | 16                       | 10.41                   |
| LTE <sub>4</sub> -d <sub>5</sub>  | 443.2               | 338.2                | 16                       | 9.62                    |
| 5-HETE-d <sub>8</sub>             | 327.2               | 116.0                | 15                       | 14.93                   |
| 12-HETE-d <sub>8</sub>            | 327.2               | 184.2                | 7                        | 14.38                   |
| 15-HETE-d <sub>8</sub>            | 327.2               | 226.2                | 13                       | 13.76                   |
| AA-d <sub>8</sub>                 | 311.2               | 267.2                | 12                       | 18.91                   |
| RvD1-d <sub>5</sub>               | 380.1               | 141.1                | 13                       | 7.71                    |
| RvD2-d <sub>5</sub>               | 380.1               | 141.1                | 13                       | 7.05                    |
| LXA <sub>4</sub> -d <sub>5</sub>  | 356.2               | 115.1                | 13                       | 7.75                    |
| 15(S)-HETE-d <sub>8</sub> -PFB    | 327.28              | 226.18               | 13                       | 11.23                   |

\* 15-HETE-d<sub>8</sub>- I.S. for 12-HHT; RvD2-d<sub>5</sub>- I.S. for RvE1; LXA<sub>4</sub>-d<sub>5</sub>- I.S. for MaR1; LXA<sub>4</sub>-d<sub>5</sub>- I.S. for PD  
I.S. – Internal Standard, PFB - 2,3,4,5,6-pentafluorobenzyl.

**Supplementary Table 2. Multiple reaction monitoring (MRM) conditions for UPLC-MS/MS and parallel reaction monitoring (PRM) conditions for UPLC-ECAPCI/HRMS methods for eicosanoid identification and quantitation.**

| <b>Treatment</b>                           | <b>Eicosanoid</b>       | <b>Males, n=11</b><br>(ng/ml, $\pm$ S.D.) | <b>Females, n=11</b><br>(ng/ml, $\pm$ S.D.) | <b>All subjects, n=22</b><br>(ng/ml, $\pm$ S.D.) |
|--------------------------------------------|-------------------------|-------------------------------------------|---------------------------------------------|--------------------------------------------------|
| <b>LPS</b><br>(100 $\mu$ g/ml),<br>24hr    | <b>PGE<sub>2</sub></b>  | <b>28.37 <math>\pm</math> 17</b>          | <b>22.98 <math>\pm</math> 11</b>            | <b>25.68 <math>\pm</math> 14.3</b>               |
|                                            | (PBS control)           | 0.04 $\pm$ 0.07                           | 0.05 $\pm$ 0.06                             | 0.04 $\pm$ 0.06                                  |
|                                            | <b>PGF<sub>2a</sub></b> | <b>5.95 <math>\pm</math> 2.84</b>         | <b>6.1 <math>\pm</math> 2.1</b>             | <b>6 <math>\pm</math> 2.43</b>                   |
|                                            | (PBS control)           | 0.31 $\pm$ 0.48                           | 0.37 $\pm$ 0.2                              | 0.32 $\pm$ 0.34                                  |
|                                            | <b>TxB<sub>2</sub></b>  | <b>25.62 <math>\pm</math> 8.75</b>        | <b>27.72 <math>\pm</math> 9</b>             | <b>26.67 <math>\pm</math> 8.73</b>               |
|                                            | (PBS control)           | 1.64 $\pm$ 1.33                           | 1.74 $\pm$ 1.63                             | 1.52 $\pm$ 1.48                                  |
|                                            | <b>15-HETE</b>          | <b>4.68 <math>\pm</math> 2.47</b>         | <b>4.73 <math>\pm</math> 1.82</b>           | <b>4.7 <math>\pm</math> 2.1</b>                  |
|                                            | (PBS control)           | 1.15 $\pm$ 0.42                           | 1.23 $\pm$ 0.42                             | 1.2 $\pm$ 0.42                                   |
| <b>Zymosan</b><br>(125 $\mu$ g/ml),<br>4hr | <b>LTB<sub>4</sub></b>  | <b>8.67 <math>\pm</math> 3.87</b>         | <b>8.2 <math>\pm</math> 4.53</b>            | <b>8.43 <math>\pm</math> 4.12</b>                |
|                                            | (PBS control)           | 0.02 $\pm$ 0.08                           | 0.08 $\pm$ 0.25                             | 0.05 $\pm$ 0.2                                   |
|                                            | <b>LTE<sub>4</sub></b>  | <b>12.9 <math>\pm</math> 9.68</b>         | <b>6.34 <math>\pm</math> 3.61</b>           | <b>9.62 <math>\pm</math> 7.88</b>                |
|                                            | (PBS control)           | 0.1 $\pm$ 0.3                             | 0.04 $\pm$ 0.06                             | 0.07 $\pm$ 0.2                                   |
|                                            | <b>5-HETE</b>           | <b>15.78 <math>\pm</math> 6.2</b>         | <b>14.4 <math>\pm</math> 6.77</b>           | <b>15.1 <math>\pm</math> 6.37</b>                |
|                                            | (PBS control)           | 1.42 $\pm$ 0.5                            | 1.45 $\pm$ 0.7                              | 1.43 $\pm$ 0.6                                   |

**Supplementary Table 3. Production of eicosanoids in stimulated human whole blood *in vitro*.** Heparinized whole blood was incubated with 100  $\mu$ g/ml of LPS for 24 hr or with 125  $\mu$ g/ml of zymosan for 4 hr at 37 °C. Eicosanoids were measured in plasma samples by UPLC-MS/MS as described in Methods. Data represent means  $\pm$  S.D. of values significantly greater than PBS control. Unpaired, two-tailed *t* test.

| Analyte                                   | Drug response, ng/ml $\pm$ S.D. |               |                  |               |                    |               |                     |               |                   |               |                    |               |
|-------------------------------------------|---------------------------------|---------------|------------------|---------------|--------------------|---------------|---------------------|---------------|-------------------|---------------|--------------------|---------------|
|                                           | MF-63<br>(n=5)                  |               | Aspirin<br>(n=4) |               | Celecoxib<br>(n=5) |               | Diclofenac<br>(n=5) |               | GW406381<br>(n=5) |               | CJ-042794<br>(n=5) |               |
|                                           | LPS<br>+DMSO                    | LPS+<br>drug  | LPS<br>+DMSO     | LPS+<br>drug  | LPS<br>+DMSO       | LPS+<br>drug  | LPS<br>+DMSO        | LPS+<br>drug  | LPS<br>+DMSO      | LPS+<br>drug  | LPS<br>+DMSO       | LPS+<br>drug  |
| <b>PGE<sub>2</sub></b>                    | 26.3 $\pm$ 14                   | 12 $\pm$ 12.2 | 16.7 $\pm$ 7     | 15.8 $\pm$ 5  | 31.8 $\pm$ 19      | 2.3 $\pm$ 2.2 | 24.5 $\pm$ 18       | 0.1 $\pm$ 0.1 | 16.7 $\pm$ 6      | 0.5 $\pm$ 0.4 | 28 $\pm$ 17.5      | 30.7 $\pm$ 18 |
| <b>PGF<sub>2<math>\alpha</math></sub></b> | 9.3 $\pm$ 4.2                   | 14.1 $\pm$ 7  | 9.2 $\pm$ 2.4    | 3.1 $\pm$ 1.1 | 10.6 $\pm$ 4       | 1.1 $\pm$ 0.4 | 11.4 $\pm$ 6        | 0.3 $\pm$ 0.1 | 9.2 $\pm$ 2.4     | 0.5 $\pm$ 0.3 | 8.4 $\pm$ 3.7      | 10.7 $\pm$ 6  |
| <b>TxB<sub>2</sub></b>                    | 34.2 $\pm$ 13                   | 46.8 $\pm$ 17 | 44.4 $\pm$ 6     | 15.3 $\pm$ 4  | 33.8 $\pm$ 12      | 6.6 $\pm$ 2.5 | 35.1 $\pm$ 16       | 0.9 $\pm$ 0.2 | 44.4 $\pm$ 6      | 6.3 $\pm$ 2   | 35.3 $\pm$ 11      | 47.6 $\pm$ 20 |
| <b>15-HETE</b>                            | 8.9 $\pm$ 2.8                   | 10.2 $\pm$ 4  | 6 $\pm$ 0.85     | 3.9 $\pm$ 0.5 | 9.8 $\pm$ 3.2      | 2.5 $\pm$ 1   | 8.2 $\pm$ 3.3       | 1.7 $\pm$ 0.5 | 6 $\pm$ 0.8       | 1.5 $\pm$ 0.5 | 7.5 $\pm$ 2.1      | 9 $\pm$ 3     |
| <b>12-HETE</b>                            | 221 $\pm$ 150                   | 244 $\pm$ 149 | 86 $\pm$ 28.8    | 117 $\pm$ 30  | 204 $\pm$ 138      | 221 $\pm$ 130 | 145 $\pm$ 80        | 176 $\pm$ 56  | 86 $\pm$ 29       | 95 $\pm$ 23   | 144 $\pm$ 98       | 190 $\pm$ 125 |
| <b>5-HETE</b>                             | 5.8 $\pm$ 6.7                   | 5.7 $\pm$ 6.7 | 1.6 $\pm$ 1.3    | 1.8 $\pm$ 0.5 | 2.8 $\pm$ 0.8      | 3 $\pm$ 0.9   | 2.7 $\pm$ 0.8       | 3 $\pm$ 0.9   | 1.6 $\pm$ 1.3     | 4.1 $\pm$ 4.9 | 3.1 $\pm$ 1        | 3.2 $\pm$ 1.1 |

**Supplementary Table 4. Interindividual variability in drug response to high doses of the COX pathway inhibitors.** Plasma eicosanoid profiles of human whole blood stimulated with 100  $\mu$ g/ml LPS and treated MF-63, celecoxib, diclofenac, GW406381, CJ-042794 or aspirin for 24 hr. All compounds, except aspirin (1.5 mM), were used at 10  $\mu$ M concentration. *In vitro* human whole-blood assay and UPLC-MS/MS analysis were performed as described in Methods. Data expressed in ng/ml and compared to LPS+DMSO control.



| Analyte                                   | Drug response, ng/ml $\pm$ S.D. |               |                  |               |                    |               |                     |               |                   |               |                    |               |
|-------------------------------------------|---------------------------------|---------------|------------------|---------------|--------------------|---------------|---------------------|---------------|-------------------|---------------|--------------------|---------------|
|                                           | MF-63<br>(n=5)                  |               | Aspirin<br>(n=4) |               | Celecoxib<br>(n=5) |               | Diclofenac<br>(n=5) |               | GW406381<br>(n=5) |               | CJ-042794<br>(n=5) |               |
|                                           | LPS<br>+DMSO                    | LPS+<br>drug  | LPS<br>+DMSO     | LPS+<br>drug  | LPS<br>+DMSO       | LPS+<br>drug  | LPS<br>+DMSO        | LPS+<br>drug  | LPS<br>+DMSO      | LPS+<br>drug  | LPS<br>+DMSO       | LPS+<br>drug  |
| <b>PGE<sub>2</sub></b>                    | 26.3 $\pm$ 14                   | 15.3 $\pm$ 8  | 16.7 $\pm$ 7     | 17.8 $\pm$ 6  | 31.8 $\pm$ 19      | 18.8 $\pm$ 11 | 18 $\pm$ 12         | 4.8 $\pm$ 5   | 16.7 $\pm$ 6      | 18.1 $\pm$ 6  | 28 $\pm$ 17.5      | 28.6 $\pm$ 18 |
| <b>PGF<sub>2<math>\alpha</math></sub></b> | 9.3 $\pm$ 4.2                   | 13.5 $\pm$ 9  | 9.2 $\pm$ 2.4    | 9.8 $\pm$ 3.5 | 10.6 $\pm$ 4       | 6.2 $\pm$ 2.5 | 6 $\pm$ 3.8         | 1.5 $\pm$ 0.9 | 9.2 $\pm$ 2.4     | 10 $\pm$ 3    | 8.4 $\pm$ 3.7      | 9.4 $\pm$ 5   |
| <b>TxB<sub>2</sub></b>                    | 34.2 $\pm$ 13                   | 44 $\pm$ 19.4 | 44.4 $\pm$ 6     | 44.5 $\pm$ 10 | 33.8 $\pm$ 12      | 24 $\pm$ 7.6  | 28.2 $\pm$ 11       | 12 $\pm$ 5.7  | 44.4 $\pm$ 6      | 47.2 $\pm$ 12 | 35.3 $\pm$ 11      | 42.5 $\pm$ 18 |
| <b>15-HETE</b>                            | 8.9 $\pm$ 2.8                   | 9.5 $\pm$ 3.4 | 6 $\pm$ 0.85     | 6.2 $\pm$ 1.2 | 9.8 $\pm$ 3.2      | 6.2 $\pm$ 1   | 3.6 $\pm$ 1.4       | 1.5 $\pm$ 0.6 | 6 $\pm$ 0.8       | 6.2 $\pm$ 1   | 7.5 $\pm$ 2.1      | 9.2 $\pm$ 4.6 |
| <b>12-HETE</b>                            | 221 $\pm$ 150                   | 232 $\pm$ 133 | 86 $\pm$ 28.8    | 85 $\pm$ 18   | 204 $\pm$ 138      | 191 $\pm$ 108 | 52 $\pm$ 23         | 65 $\pm$ 24   | 86 $\pm$ 29       | 94 $\pm$ 27   | 144 $\pm$ 98       | 173 $\pm$ 117 |
| <b>5-HETE</b>                             | 5.8 $\pm$ 6.7                   | 6.4 $\pm$ 7.6 | 1.6 $\pm$ 1.3    | 1.4 $\pm$ 1.2 | 2.8 $\pm$ 0.8      | 3.1 $\pm$ 0.8 | 1.2 $\pm$ 0.3       | 1.3 $\pm$ 0.4 | 1.6 $\pm$ 1.3     | 4 $\pm$ 5.6   | 3.1 $\pm$ 1        | 3.2 $\pm$ 1.1 |

**Supplementary Table 5. Interindividual variability in drug response to the COX pathway inhibitors at IC<sub>50</sub> doses.** Plasma eicosanoid profiles of human whole blood stimulated with 100  $\mu$ g/ml LPS and treated MF-63, celecoxib, diclofenac, GW406381, CJ-042794 or aspirin for 24 hr. All compounds, except aspirin (15  $\mu$ M), were used at the corresponding IC<sub>50</sub>. *In vitro* human whole-blood assay and UPLC-MS/MS analysis were performed as described in Methods. Data expressed in ng/ml and compared to LPS+DMSO control.
